# Supplementary material for: Anchoring polysulfides via a CoS2/NC@1T MoS2 modified separator for high-performance lithium–sulfur batteries
Source: Royal Society of Chemistry journal article supplement (doi:10.1039/d2qi01884e), 2022-12-16
Supplement: d2qi01884e1.pdf [file d2qi01884e1.pdf]

## Supplementary Information

### **Anchoring polysulfides via CoS<sub>2</sub>/NC@1T MoS<sub>2</sub> modified separator for high-performance lithium-sulfur batteries**

Qicheng Li, Hui Liu, Bo Jin,\* Lei Li, Qidong Sheng, Mengyang Cui, Yiyang Li,  
Xingyou Lang, Yongfu Zhu, Lijun Zhao, Qing Jiang\*

Key Laboratory of Automobile Materials, Ministry of Education, and School of  
Materials Science and Engineering, Jilin University, Changchun 130022, China

---

\* Corresponding author. E-mail: jiangq@jlu.edu.cn (Q. Jiang)

\* Corresponding author. E-mail: jinbo@jlu.edu.cn (B. Jin)

Supplementary Figures

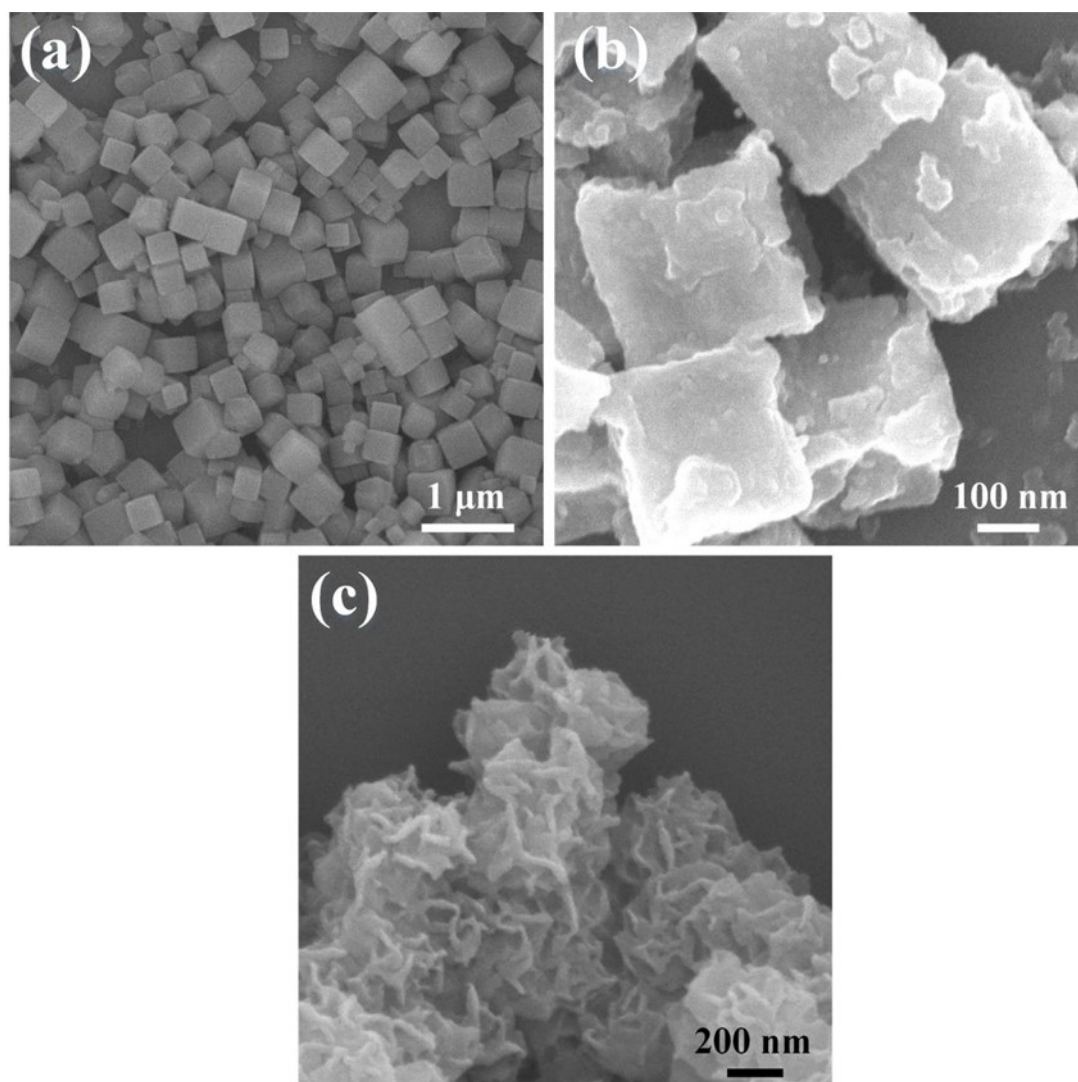

**Figure S1** FESEM images of (a) ZIF-67, (b) Co/NC, and (c) CoS<sub>2</sub>/NC@1T MoS<sub>2</sub>.

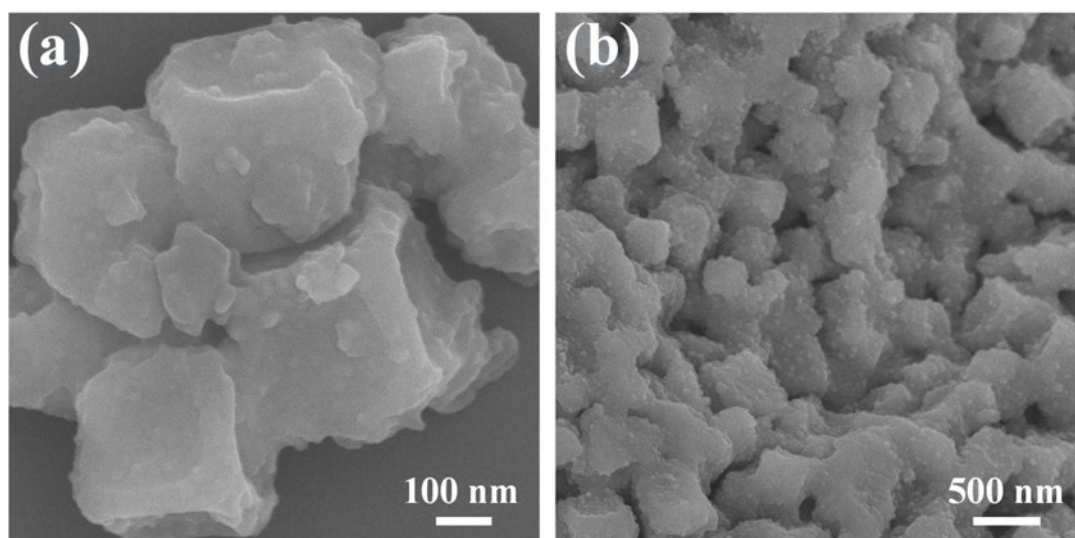

**Figure S2** FESEM images of CoS<sub>2</sub>/NC with (a) high-resolution and (b) low-resolution.

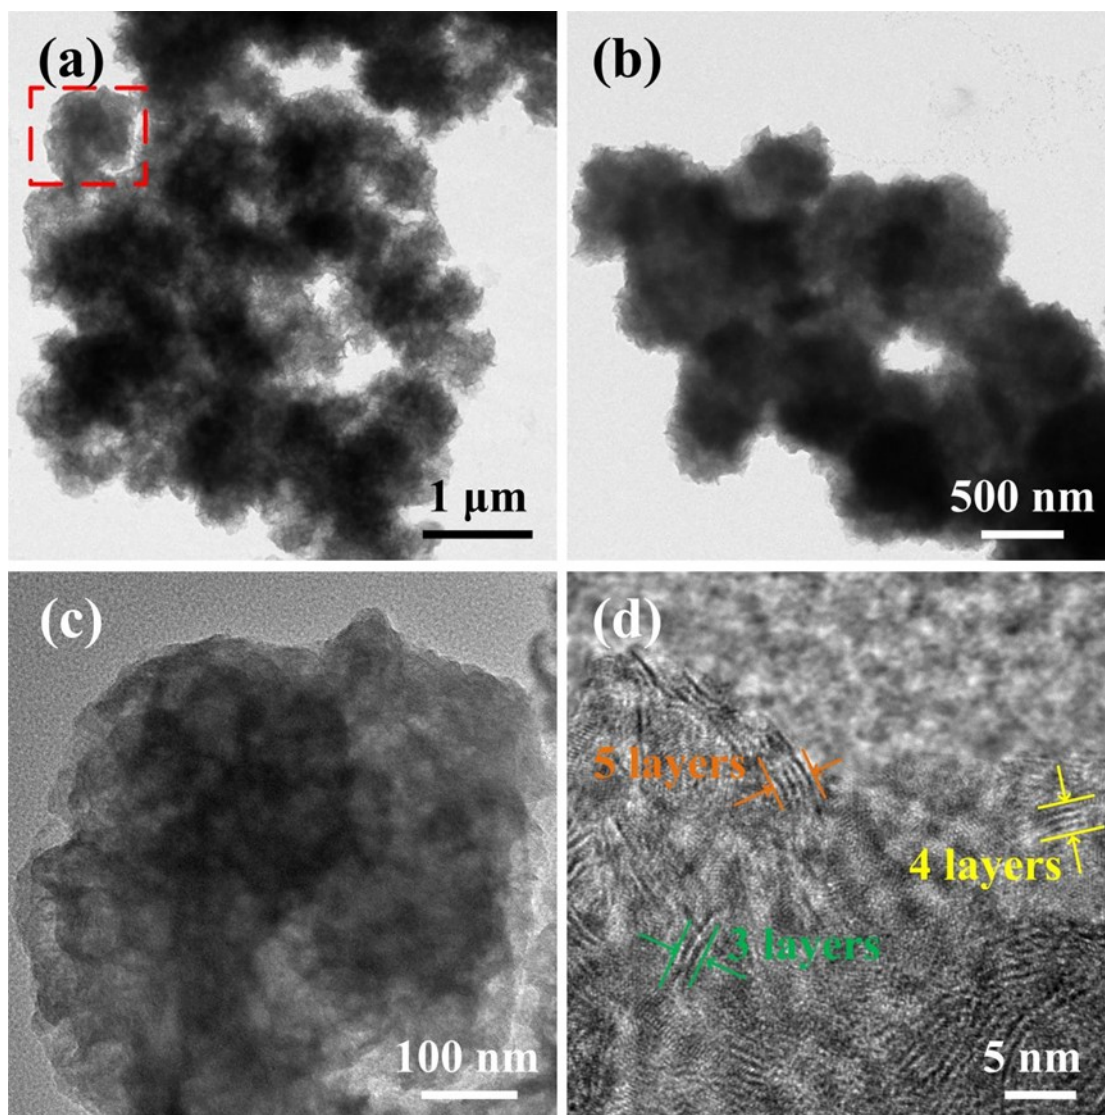

**Figure S3** (a,b) TEM images of CoS<sub>2</sub>/NC@1T MoS<sub>2</sub> with different magnifications. (c) Enlarged TEM image of the red frame in (a). (d) HRTEM image of CoS<sub>2</sub>/NC@1T MoS<sub>2</sub>.

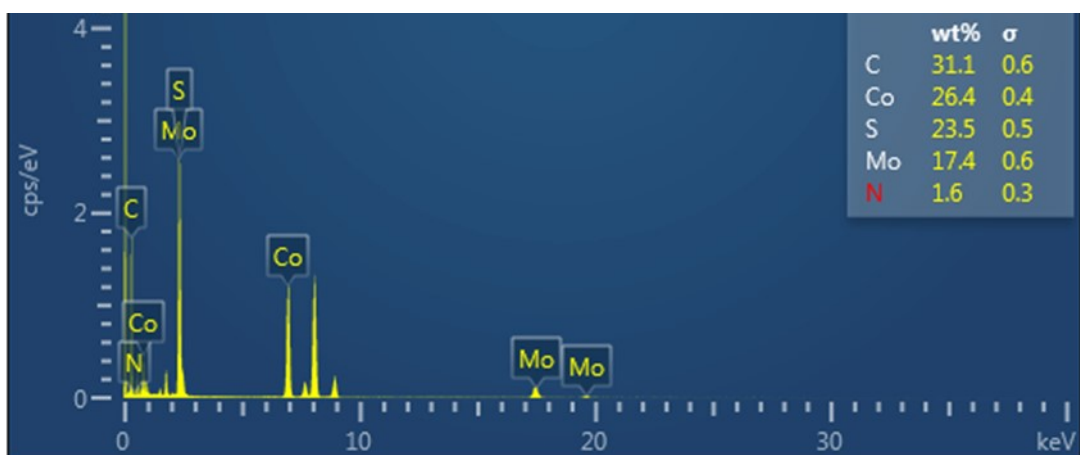

**Figure S4** EDS elemental composition diagram of CoS<sub>2</sub>/NC@1T MoS<sub>2</sub>.

According to the EDS elemental composition diagram of TEM (Figure S4), the total amount of N and C elements in CoS<sub>2</sub>/NC@1T MoS<sub>2</sub> is 32.7 wt%. Since Co, Mo, and S elements exist in the form of chemical compounds, we use more accurate inductively coupled plasma emission spectrometry to determine their elemental composition.

To prepare the ICP sample, a certain amount of CoS<sub>2</sub>/NC@1T MoS<sub>2</sub> was dissolved in nitric acid, and treated overnight at 60 °C. The as-obtained solution was diluted with deionized water into a concentration of 0.5 mg/L solution. The ICP results show that the concentrations of Mo and Co in CoS<sub>2</sub>/NC@1T MoS<sub>2</sub> are 0.0751 and 0.0154 mg/L, respectively. The contents of 1T MoS<sub>2</sub> and CoS<sub>2</sub> are calculated by formulas as follows:

$$1T MoS_2$$

$$wt\% = \frac{0.0751 \text{ mg/L} \times 160/96}{0.0751 \text{ mg/L} \times 160/96 + 0.0154 \text{ mg/L} \times 123/59} \times 67.3\% = 53.6\%$$

$$CoS_2 \text{ wt}\% = \frac{0.0154 \text{ mg/L} \times 123/59}{0.0751 \text{ mg/L} \times 160/96 + 0.0154 \text{ mg/L} \times 123/59} \times 67.3\% = 13.7\%$$

According to Figure S4 and the above calculations, the contents of each component in CoS<sub>2</sub>/NC@1T MoS<sub>2</sub> are 53.6 wt% for 1T MoS<sub>2</sub>, 13.7 wt% for CoS<sub>2</sub>, and 32.7 wt% for NC, respectively.



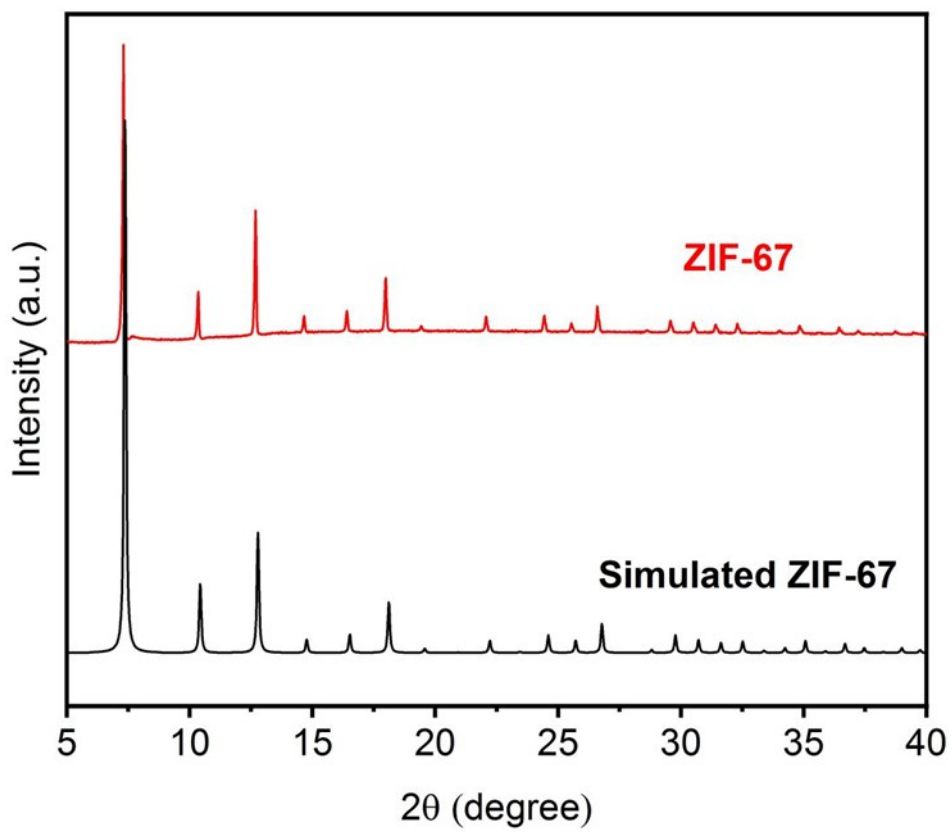

**Figure S5** XRD pattern of ZIF-67.

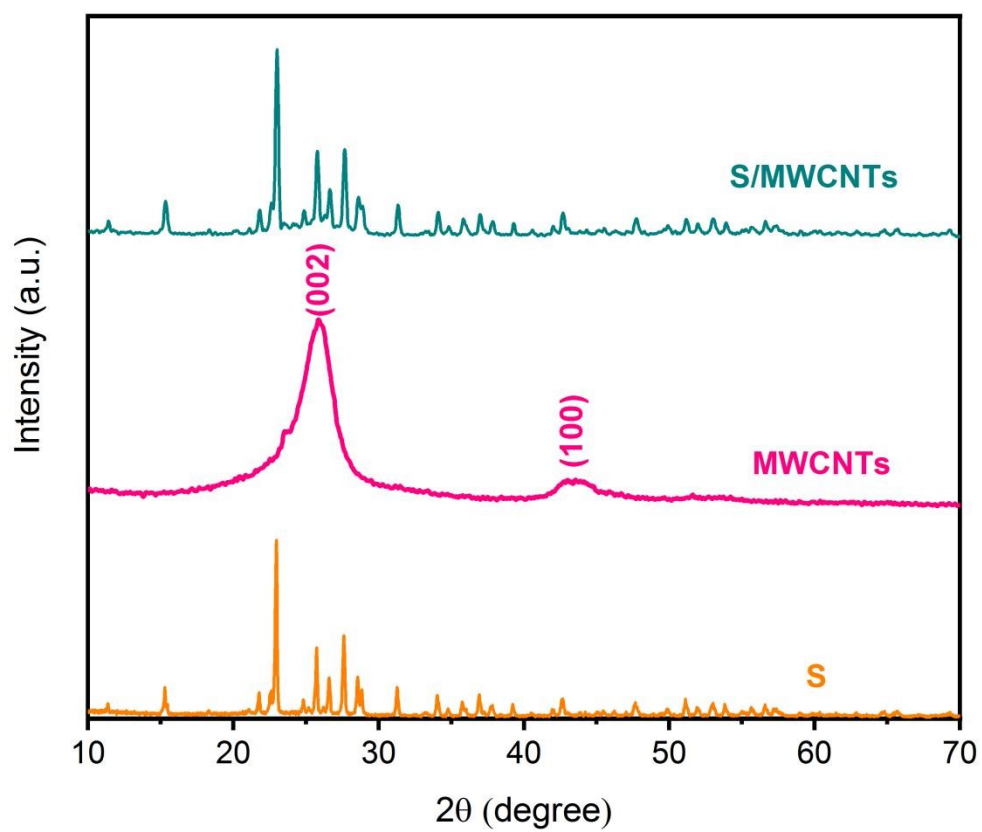

**Figure S6** XRD patterns of S, MWCNTs, and S/MWCNTs.



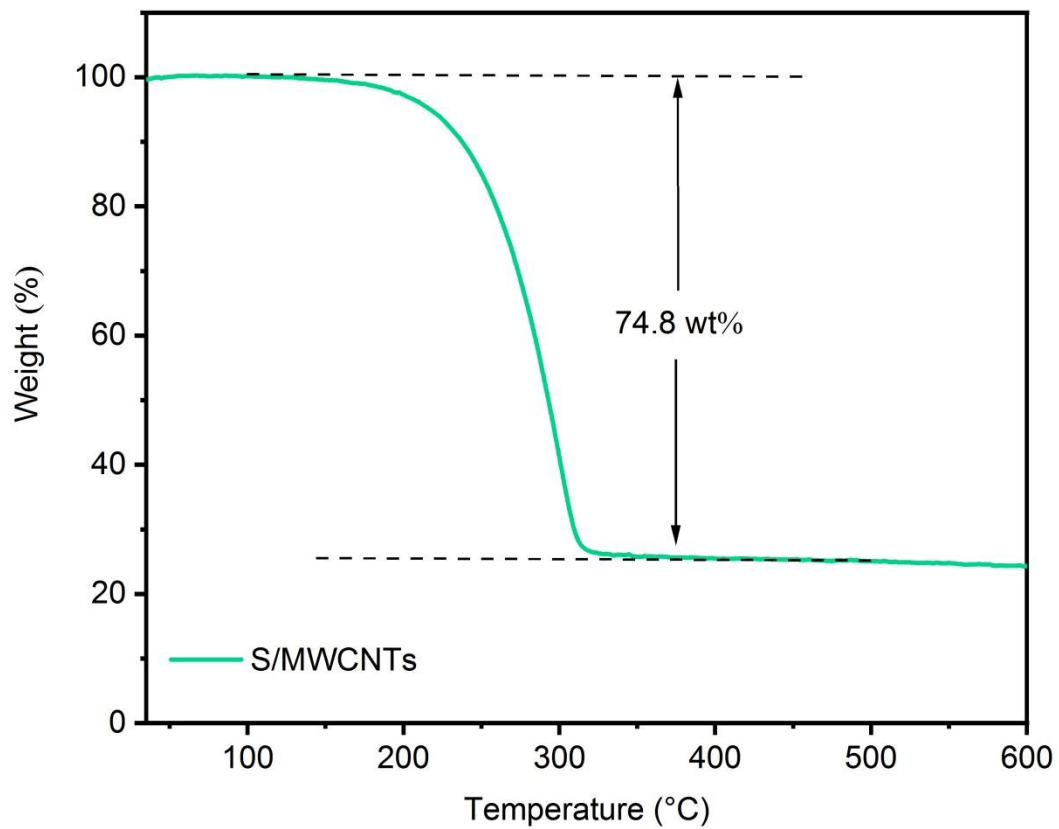

**Figure S7** TGA curve of S/MWCNTs.

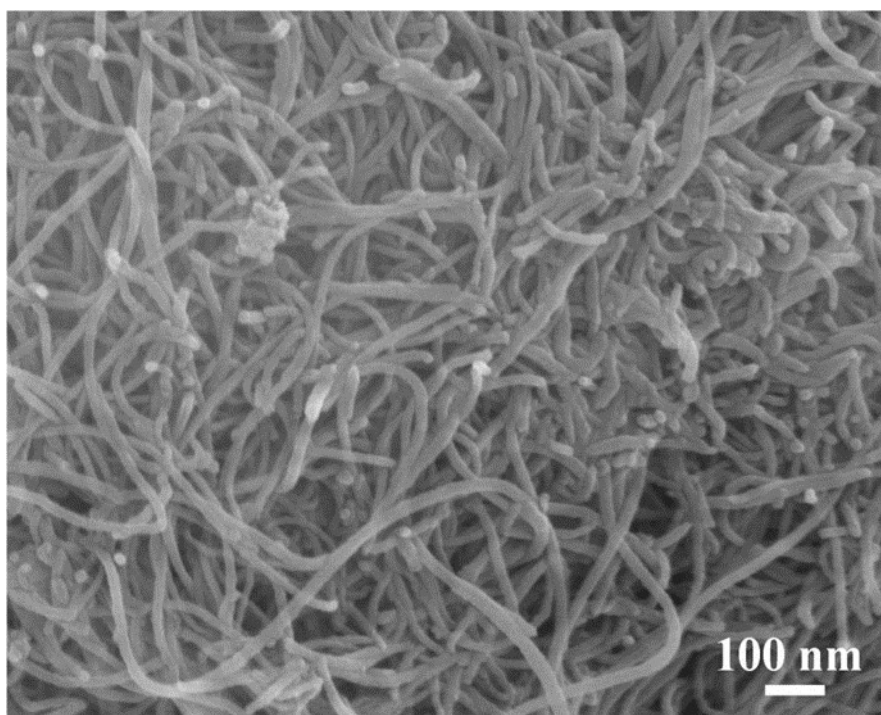

**Figure S8** FESEM image of S/MWCNTs.

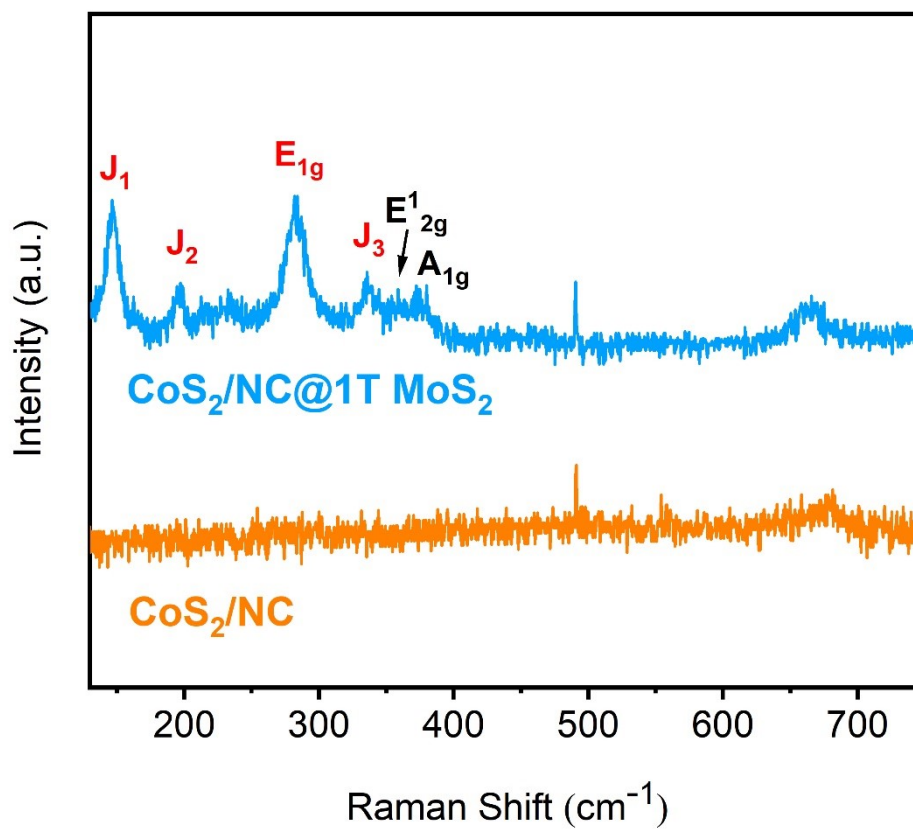

**Figure S9** Raman spectra of  $\text{CoS}_2/\text{NC}$  and  $\text{CoS}_2/\text{NC}@1\text{T MoS}_2$  in Raman shift range of 130-750  $\text{cm}^{-1}$ .

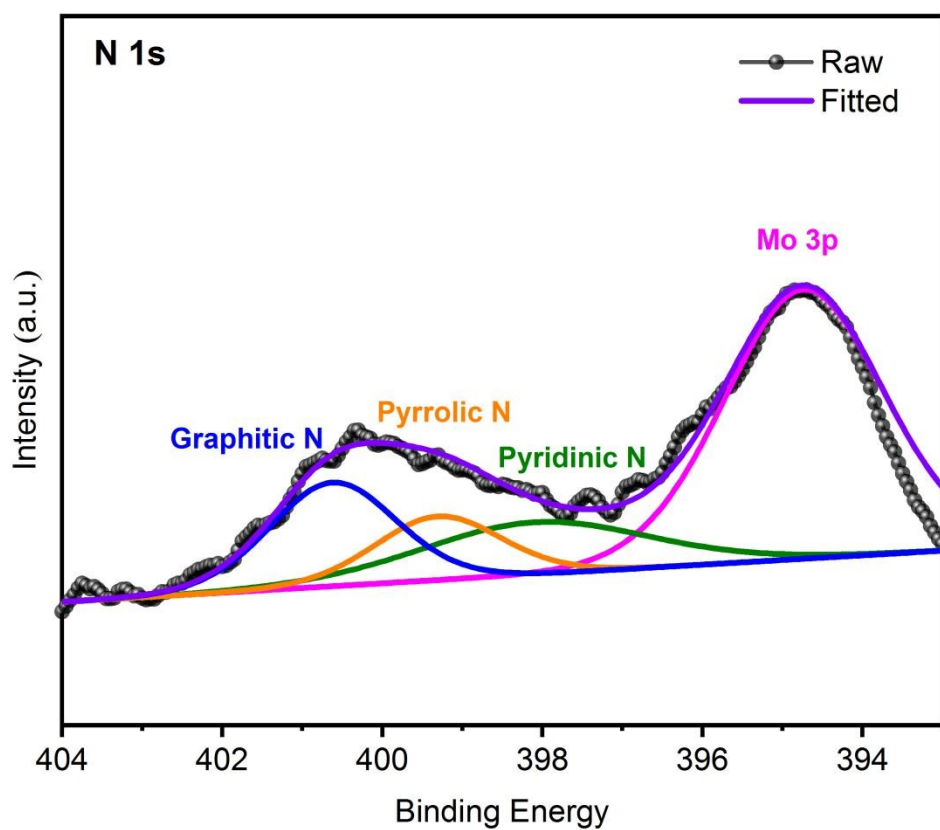

**Figure S10** High-resolution XPS spectrum of N 1s of CoS<sub>2</sub>/NC@1T MoS<sub>2</sub>.

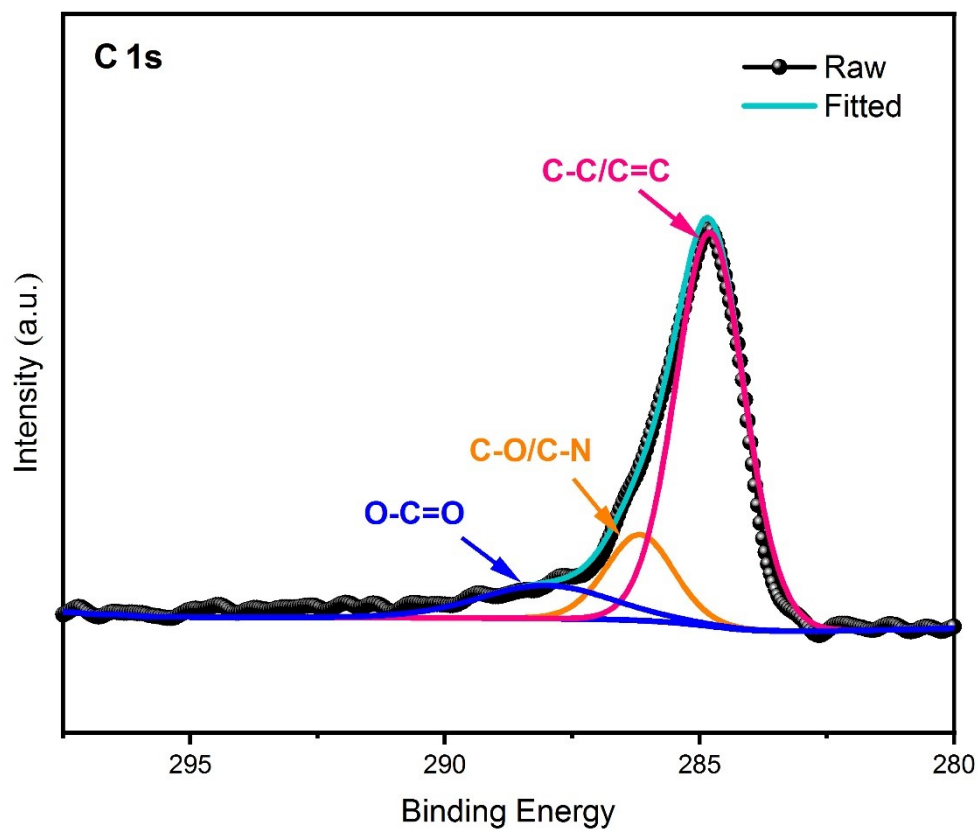

**Figure S11** High-resolution XPS spectrum of C 1s of CoS<sub>2</sub>/NC@1T MoS<sub>2</sub>.

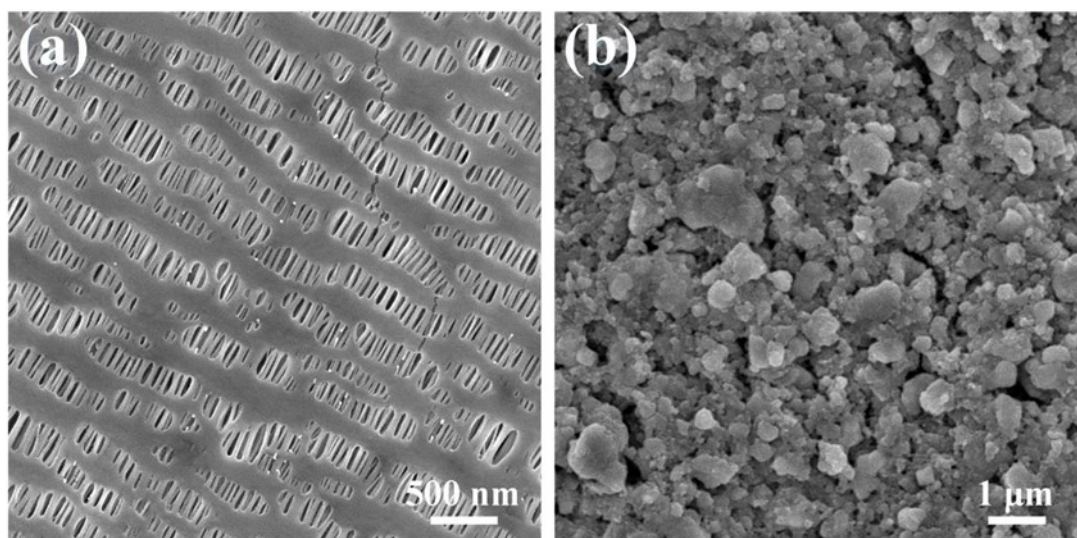

**Figure S12** FESEM images of surfaces of (a) pure PP and (b) CoS<sub>2</sub>/NC@1T MoS<sub>2</sub>-PP separators before cycle.

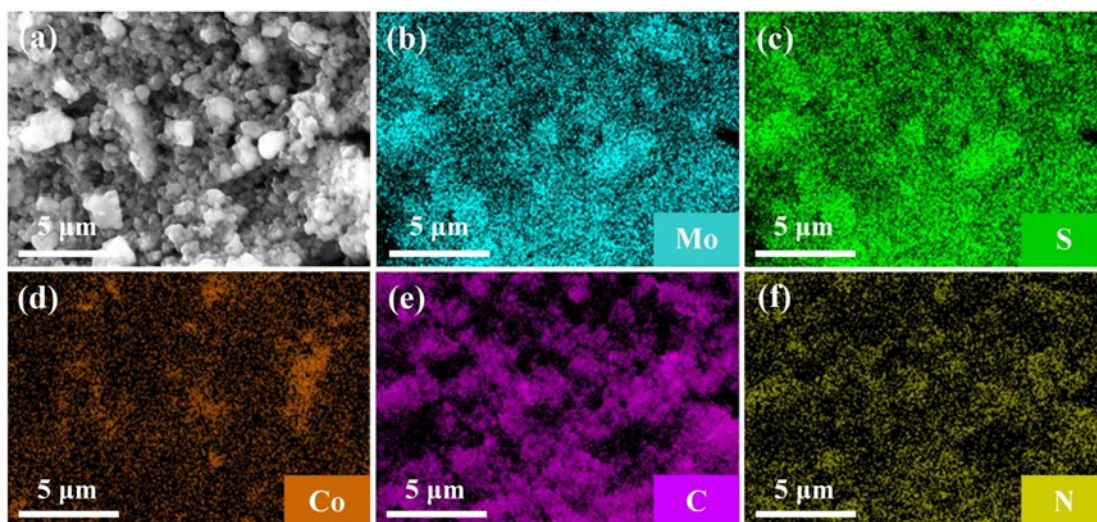

**Figure S13** (a) Top STEM image of  $\text{CoS}_2/\text{NC}@1\text{T MoS}_2\text{-PP}$  separator, and (b-f) corresponding elemental mappings of Mo, S, Co, C, and N.

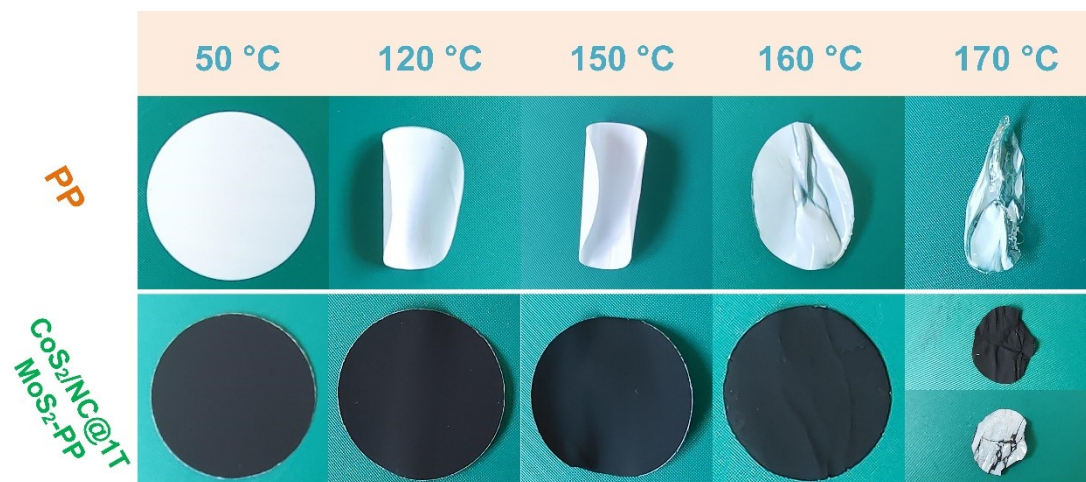

**Figure S14** Photographs of PP and CoS<sub>2</sub>/NC@1T MoS<sub>2</sub>-PP separators after heat treatment.



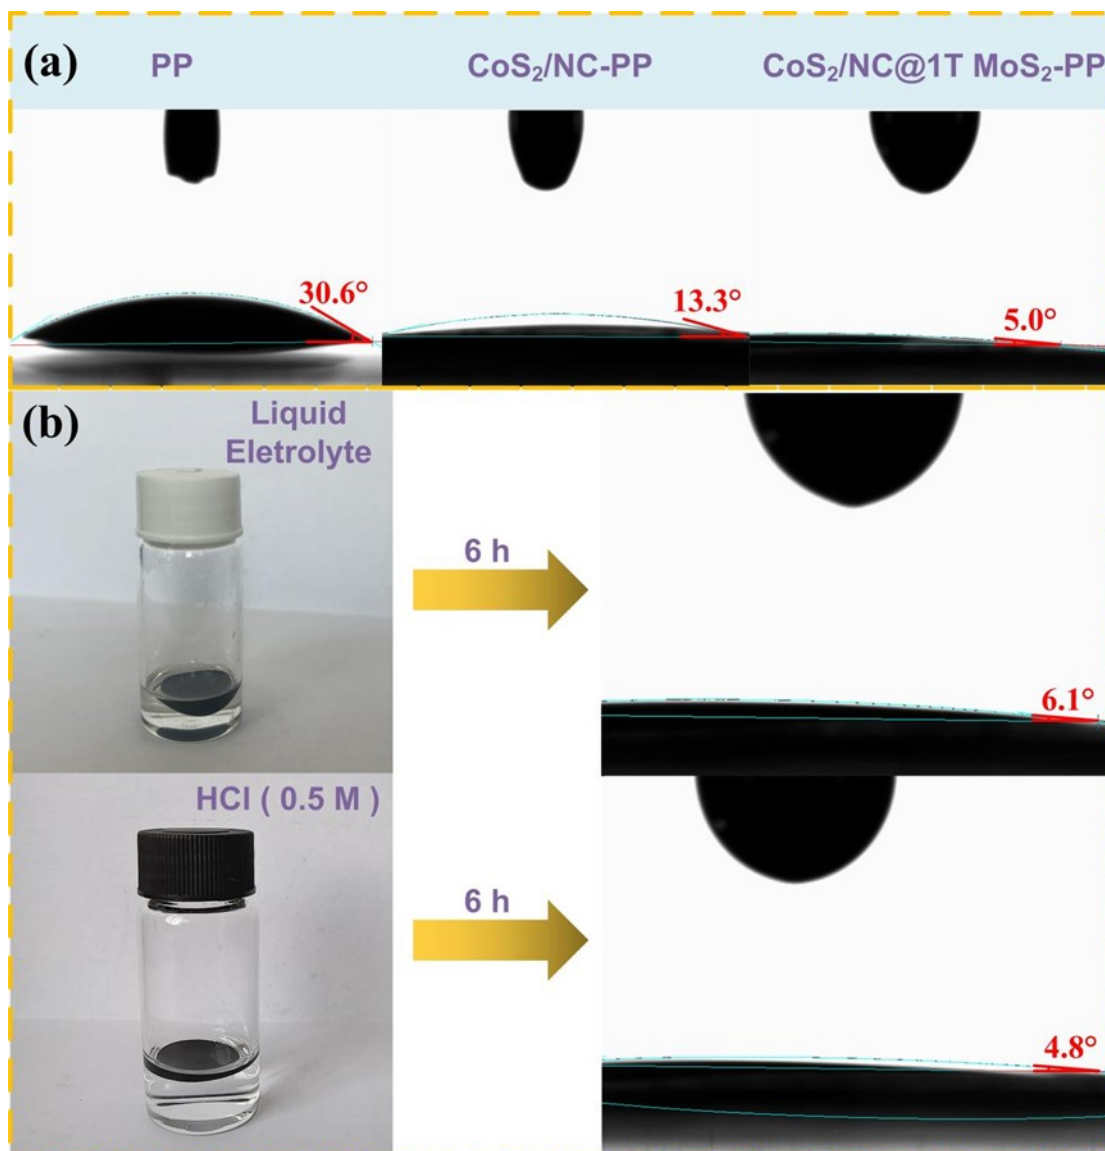

**Figure S15** (a) Wettability of pure PP, CoS<sub>2</sub>/NC-PP, and CoS<sub>2</sub>/NC@1T MoS<sub>2</sub>-PP separators. (b) Chemical stability of CoS<sub>2</sub>/NC@1T MoS<sub>2</sub>-PP separator.

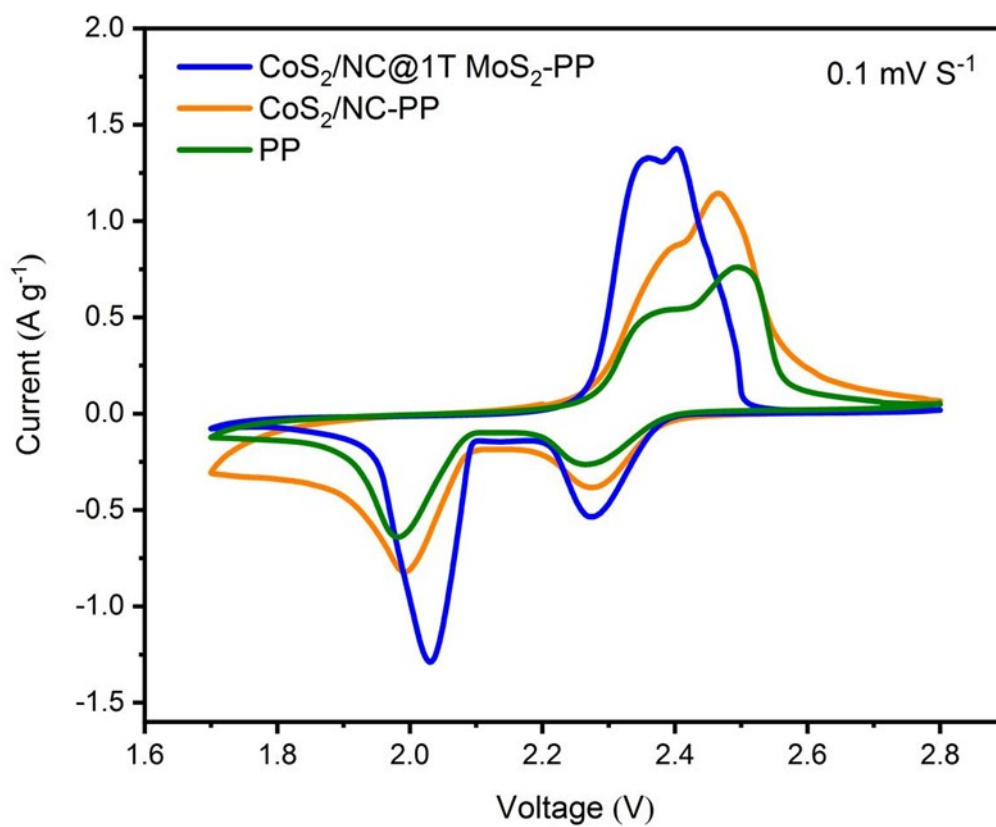

**Figure S16** CV curves of lithium-sulfur batteries with CoS<sub>2</sub>/NC@1T MoS<sub>2</sub>-PP, CoS<sub>2</sub>/NC-PP, and pure PP separators at a scan rate of 0.1 mV S<sup>-1</sup>.

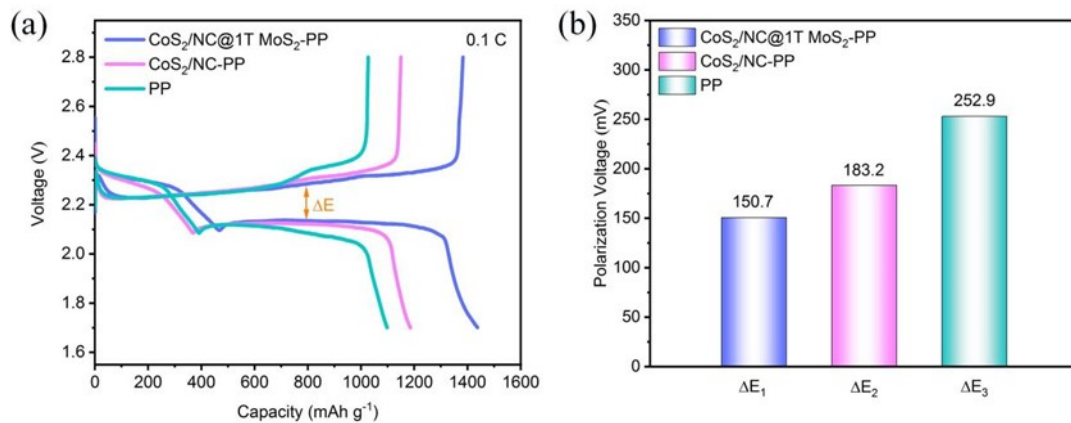

**Figure S17** (a) Initial charge/discharge curves and (b) corresponding polarization voltage bar graphs of lithium-sulfur batteries with CoS<sub>2</sub>/NC@1T MoS<sub>2</sub>-PP, CoS<sub>2</sub>/NC-PP, and pure PP separators at 0.1 C.

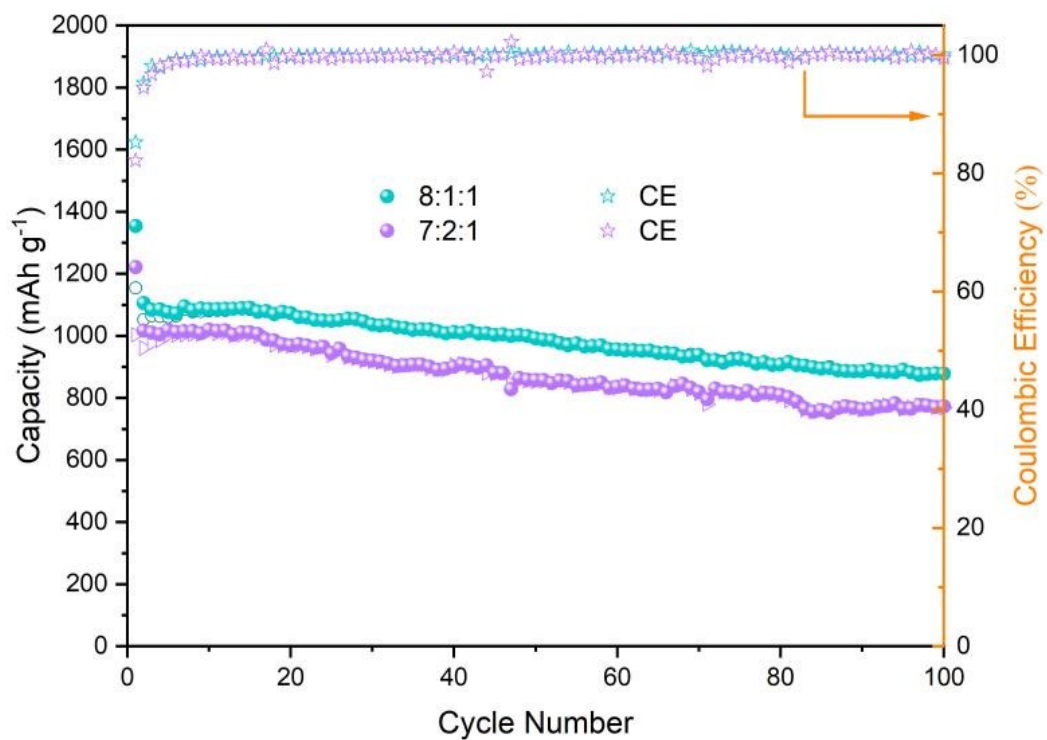

**Figure S18** Cycle performance and coulombic efficiency of lithium-sulfur batteries with  $\text{CoS}_2/\text{NC}@1\text{T MoS}_2\text{-PP}$  separator for 100 cycles at a current density of 0.2 C at different positive slurry ratios.

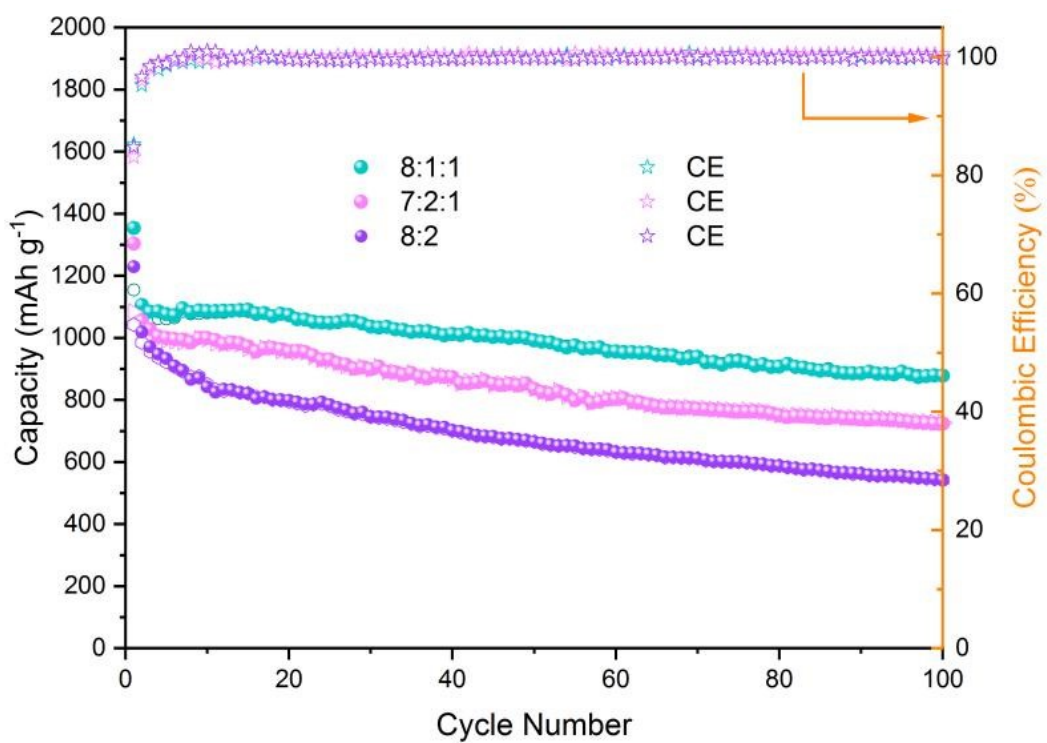

**Figure S19** Cycle performance and coulombic efficiency of lithium-sulfur batteries with  $\text{CoS}_2/\text{NC}@1\text{T MoS}_2\text{-PP}$  separator for 100 cycles at a current density of 0.2 C at different separator slurry ratios (8:2, no acetylene black).

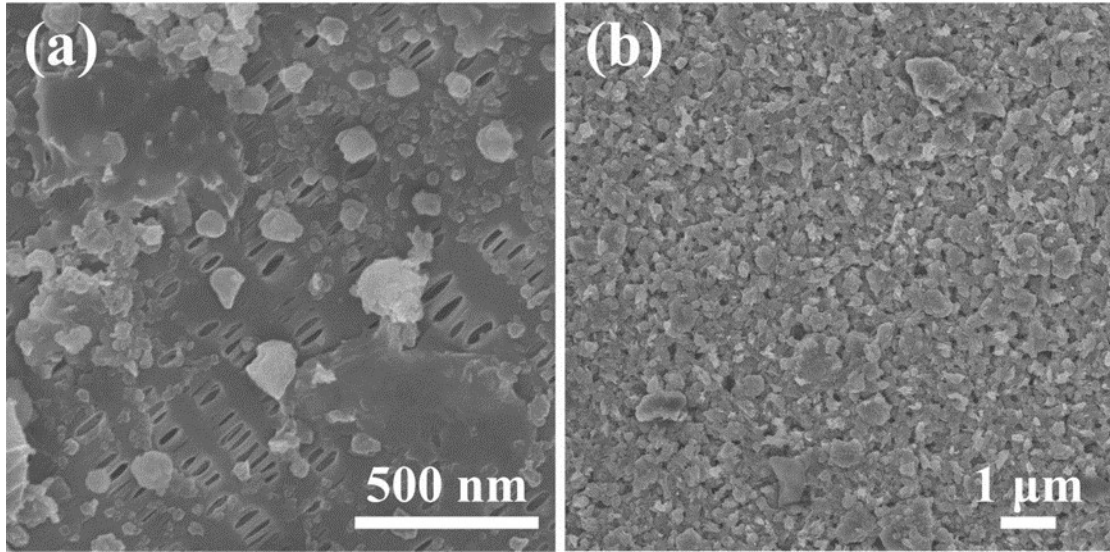

**Figure S20** SEM images of surfaces of (a) pure PP and (b)  $\text{CoS}_2/\text{NC}@1\text{T MoS}_2$ -PP separators after cycles.

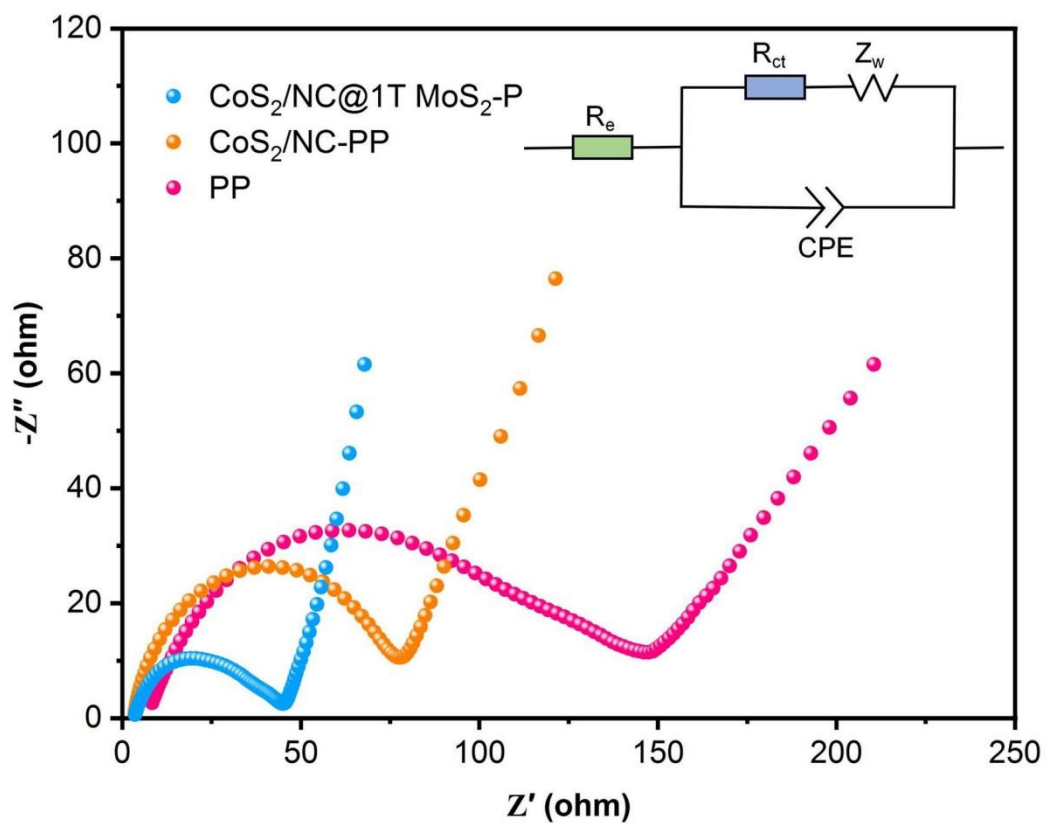

**Figure S21** AC impedance spectra of lithium-sulfur batteries with CoS<sub>2</sub>/NC@1T MoS<sub>2</sub>-PP, CoS<sub>2</sub>/NC-PP, and pure PP separators before cycle (inset: equivalent circuit).

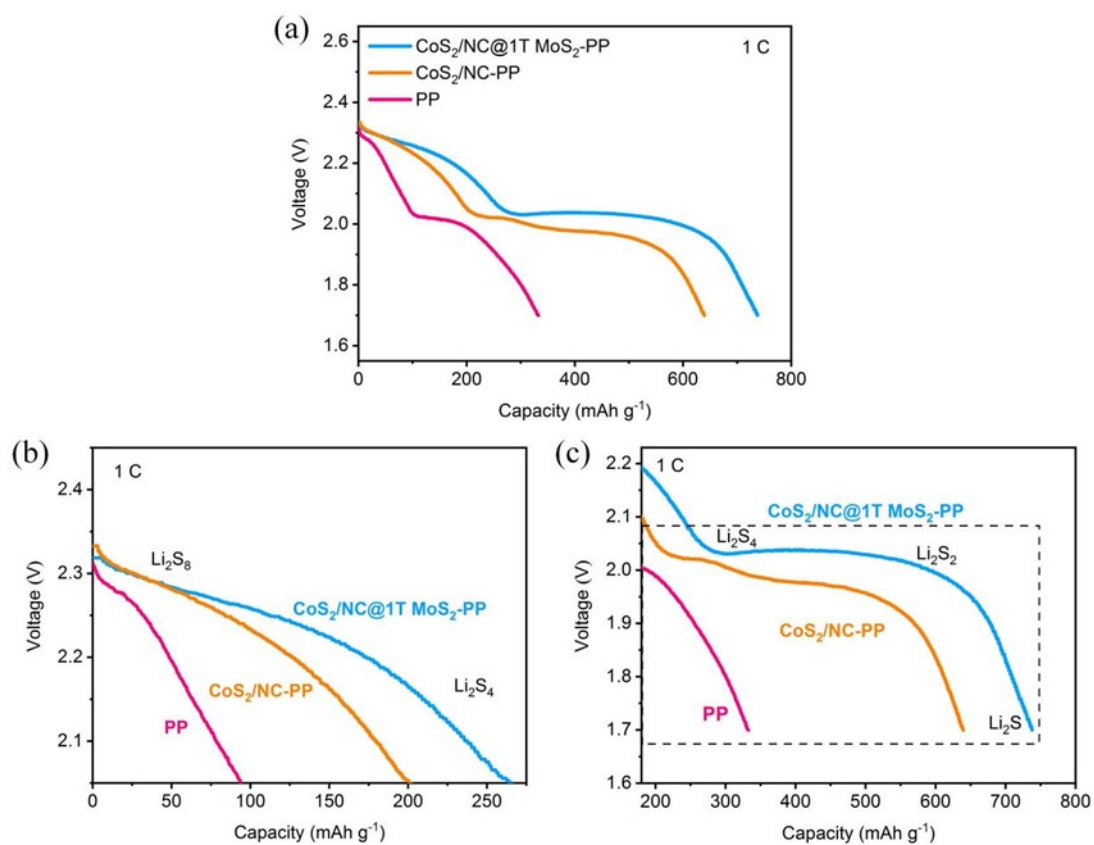

**Figure S22** (a) Discharge curves of lithium-sulfur batteries with CoS<sub>2</sub>/NC@1T MoS<sub>2</sub>-PP, CoS<sub>2</sub>/NC-PP, and pure PP separators at a current density of 1 C, and comparison of discharge curves at (b) high voltage and (c) low voltage at a current density of 1 C.



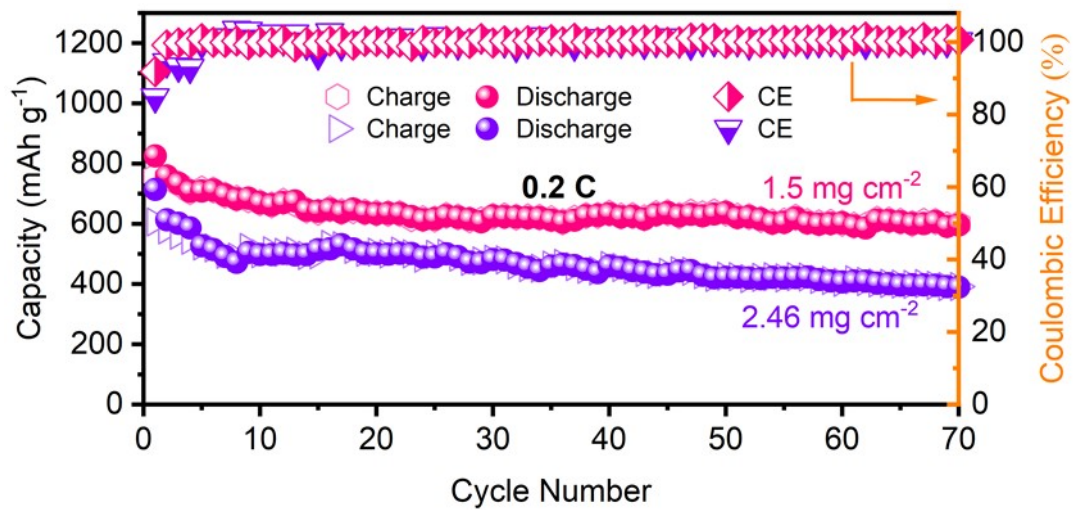

**Figure S23** Cycle performance of LSBs with different high sulfur loadings at 0.2 C.

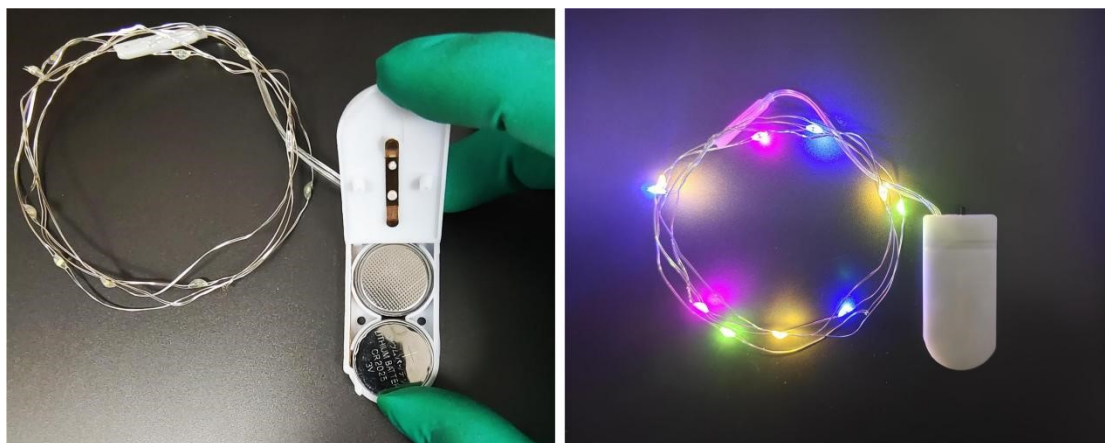

**Figure S24** Digital photos of a light-emitting diode (LED) four-color lamp string lit up by CR2025-type lithium-sulfur batteries with  $\text{CoS}_2/\text{NC}@1\text{T MoS}_2\text{-PP}$  separator.

**Table S1** Comparison of electrochemical properties of LSBs with CoS<sub>2</sub>/NC@1T MoS<sub>2</sub>-PP separator with previously reported LSBs.

| Sample                                       | Current density | Cycle number | Discharge capacity (mAh g <sup>-1</sup> ) | Capacity decay rate per cycle (%) | Ref.        |
|----------------------------------------------|-----------------|--------------|-------------------------------------------|-----------------------------------|-------------|
| CC/VN/Co@NCNTs                               | 0.1 C           | 100          | 864.1                                     | 0.35                              | S1          |
| N-MIMEC                                      | 0.1 C           | 100          | 971.3                                     | 0.253                             | S2          |
| CoSe@NC                                      | 0.1 C           | 100          | 804.7                                     | 0.39                              | S3          |
| MnO <sub>2</sub> @SnO <sub>2</sub>           | 0.1 C           | 100          | 806                                       | 0.39                              | S4          |
| 3D P-MoS <sub>2</sub>                        | 0.5 C           | 300          | 629.4                                     | 0.144                             | S5          |
| TiO <sub>2</sub>                             | 0.5 C           | 400          | 612                                       | 0.104                             | S6          |
| CP@NCNT@CoS <sub>3</sub>                     | 0.83 C          | 400          | 680                                       | 0.119                             | S7          |
| CoS <sub>2</sub> @NGCNs                      | 1 C             | 300          | 519.4                                     | 0.075                             | S8          |
| CoS <sub>2</sub> /HPGC                       | 1 C             | 500          | 519                                       | 0.07                              | S9          |
| Co-NC@N-HCS                                  | 1 C             | 450          | 399.7                                     | 0.13                              | S10         |
| CoS <sub>2</sub> /ACCF                       | 1 C             | 500          | 580                                       | 0.082                             | S11         |
| FSC/MoS <sub>2</sub> /CNTs                   | 1 C             | 500          | 615.3                                     | 0.059                             | S12         |
| <b>CoS<sub>2</sub>/NC@1T MoS<sub>2</sub></b> | <b>0.1 C</b>    | <b>100</b>   | <b>972</b>                                | <b>0.316</b>                      | <b>This</b> |
|                                              | <b>1 C</b>      | <b>500</b>   | <b>616</b>                                | <b>0.07</b>                       | <b>work</b> |

#### Notes and references

S1 D. P. Cai, Y. X. Zhuang, B. Fei, C. Q. Zhang, Y. G. Wang, Q. D. Chen, H. B. Zhan, Self-supported VN arrays coupled with N-doped carbon nanotubes embedded with Co nanoparticles as a multifunctional sulfur host for lithium-sulfur batteries, *Chem. Eng. J.*, 2022, **430**, 132931.

S2 H. Y. Shao, F. Ai, W. K. Wang, H. Zhang, A. B. Wang, F. Wang, Y. Q. Huang,

- Crab shell-derived nitrogen-doped micro-/mesoporous carbon as an effective separator coating for high energy lithium-sulfur batteries, *J. Mater. Chem. A*, 2017, **5**, 19892-19900.
- S3 X. L. Jiang, S. Zhang, B. B. Zou, G. C. Li, S. L. Yang, Y. Zhao, J. B. Lian, H. M. Li, H.B. Ji, Electrospun CoSe@NC nanofiber membrane as an effective polysulfides adsorption-catalysis interlayer for Li-S batteries, *Chem. Eng. J.*, 2022, **430**, 131911.
- S4 P. Zhou, T. L. Han, C. P. Gu, J. J. Li, Z. H. Shen, H. G. Zhang, J. J. Niu, J. H. Liu, J.Y. Liu, A novel wheel-confined composite as cathode in Li-S batteries with high capacity retention, *J. Alloy Compd.*, 2019, **776**, 504-510.
- S5 F. R. Liu, N. Wang, C. S. Shi, J. W. Sha, L. Y. Ma, E. Z. Liu, N. Q. Zhao, Phosphorus doping of 3D structural MoS<sub>2</sub> to promote catalytic activity for lithium-sulfur batteries, *Chem. Eng. J.*, 2022, **430**, 133923.
- S6 Y. Yu, M. Yan, W. D. Dong, L. Wu, Y. W. Tian, Z. Deng, L. H. Chen, T. Hasan, Y. Li, B. L. Su, Optimizing inner voids in yolk-shell TiO<sub>2</sub> nanostructure for high-performance and ultralong-life lithium-sulfur batteries, *Chem. Eng. J.*, 2021, **417**, 129241.
- S7 X. F. Yang, X. J. Gao, Q. Sun, S. P. Jand, Y. Yu, Y. Zhao, X. Li, K. Adair, L. Y. Kuo, J. Rohrer, J. N. Liang, X. T. Lin, M. N. Banis, Y. F. Hu, H. Z. Zhang, X. F. Li, R. Y. Li, H. M. Zhang, P. Kaghazchi, T. K. Sham, X. L. Sun, Promoting the transformation of Li<sub>2</sub>S<sub>2</sub> to Li<sub>2</sub>S: significantly increasing utilization of active materials for high-sulfur-loading Li-S batteries, *Adv. Mater.*, 2019, **31**, 1901220.

- S8 S. D. Seo, D. Park, S. Park, D. W. Kim, “Brain-coral-like” mesoporous hollow  $\text{CoS}_2$ @N-doped graphitic carbon nanoshells as efficient sulfur reservoirs for lithium-sulfur batteries, *Adv. Funct. Mater.*, 2019, **29**, 1903712.
- S9 Q. Q. Hu, J. Q. Lu, C. Yang, C. C. Zhang, J. L. Hu, S. Y. Chang, H. Y. Dong, C. Y. Wu, Y. Hong, L. Z. Zhang, Promoting reversible redox kinetics by separator architectures based on  $\text{CoS}_2$ /HPGC interlayer as efficient polysulfide-trapping shield for Li-S batteries, *Small*, 2020, **16**, 2002046.
- S10 X. X. Sun, S. K. Liu, W. W. Sun, Y. J. Li, D. Q. Wang, Q. P. Guo, X. B. Hong, J. Xu, C. M. Zheng, Nano-confined synthesis of multi yolk-shell  $\text{Co-NC@N-HCSs}$  hybrid as sulfur host for high performance lithium-sulfur batteries, *Electrochim. Acta*, 2021, **398**, 139302.
- S11 H. Yoon, D. Park, H. J. Song, S. Park, D. W. Kim, Vertically aligned sulfiphilic cobalt disulfide nanosheets supported on a free-standing carbon nanofiber interlayer for high-performance lithium-sulfur batteries, *ACS Sustain. Chem. Eng.*, 2021, **9**, 8487-8496.
- S12 J. Ren, Y. B. Zhou, L. Xia, Q. J. Zheng, J. Liao, E. Y. Long, F. Y. Xie, C. G. Xu, D. M. Lin, Rational design of a multidimensional N-doped porous carbon/ $\text{MoS}_2$ /CNT nano-architecture hybrid for high performance lithium-sulfur batteries, *J. Mater. Chem. A*, 2018, **6**, 13835-13847.
